# Supplementary material for: Global characterization of extrachromosomal circular DNAs in advanced high grade serous ovarian cancer
Source: PubMed Central journal article supplement (PMC9007969; doi:10.1038/s41419-022-04807-8), 2022-04-13
Supplement: 41419_2022_4807_MOESM2_ESM.pdf [file 41419_2022_4807_MOESM2_ESM.pdf]

## **Supplementary Fig. 1-6**

**for**

## **Global characterization of extrachromosomal circular DNAs in advanced high grade serous ovarian cancer**

Yixuan Cen, Yifeng Fang, Yan Ren, Shiyuan Hong \*, Weiguo Lu \* and Junfen Xu \*

\*Corresponding authors: Dr. Junfen Xu, email: [xjfzu@zju.edu.cn](mailto:xjfzu@zju.edu.cn)

Prof. Weiguo Lu, e-mail: [lbwg@zju.edu.cn](mailto:lbwg@zju.edu.cn)

Prof. Shiyuan Hong, email: [hongshiyuan@cqmu.edu.cn](mailto:hongshiyuan@cqmu.edu.cn)

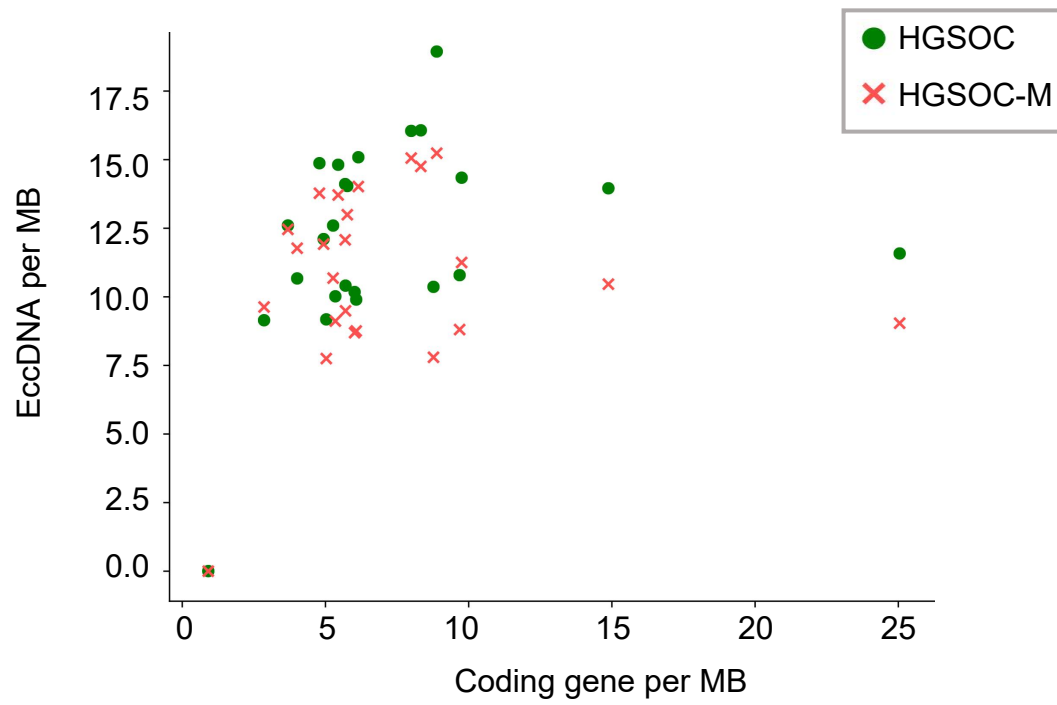

**Supplementary Fig. 1** EccDNA counts per MB from HGSOC-M tissues (red cross, n=4) and HGSOC tissues (green dot, n=4) per coding genes per MB.

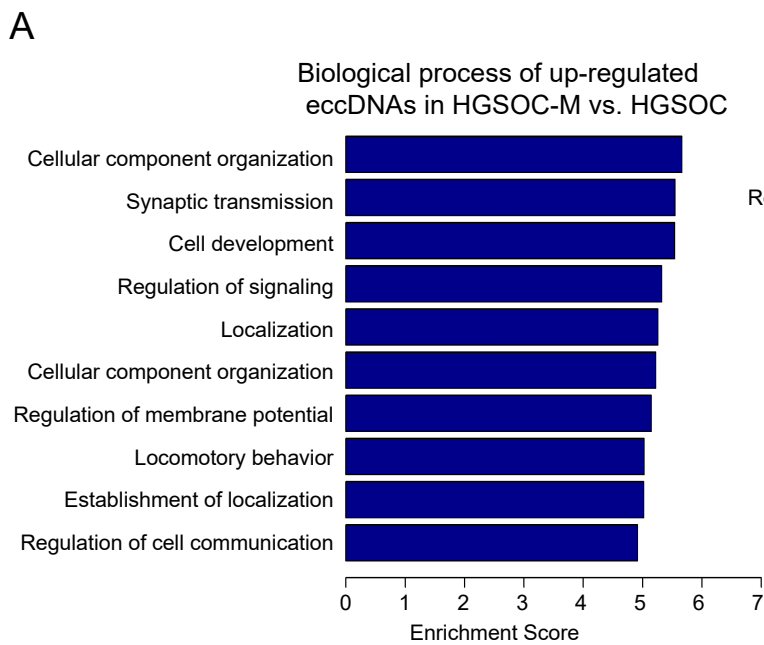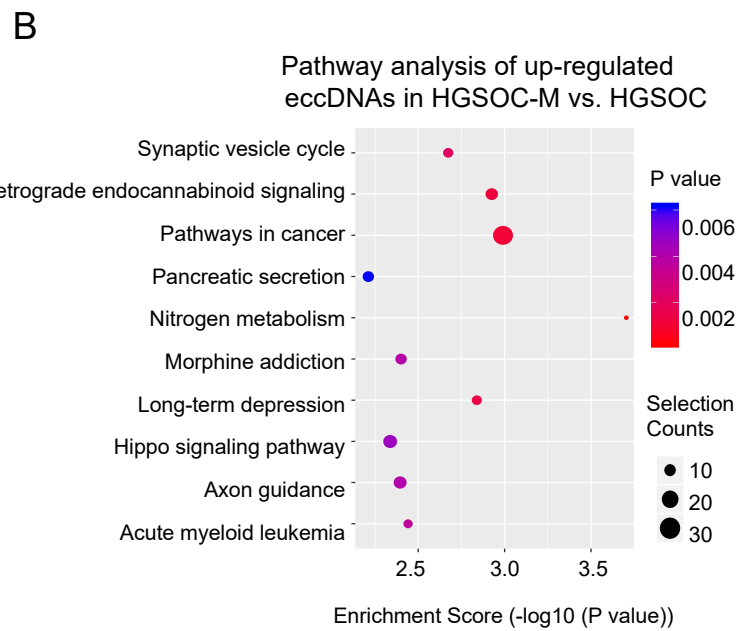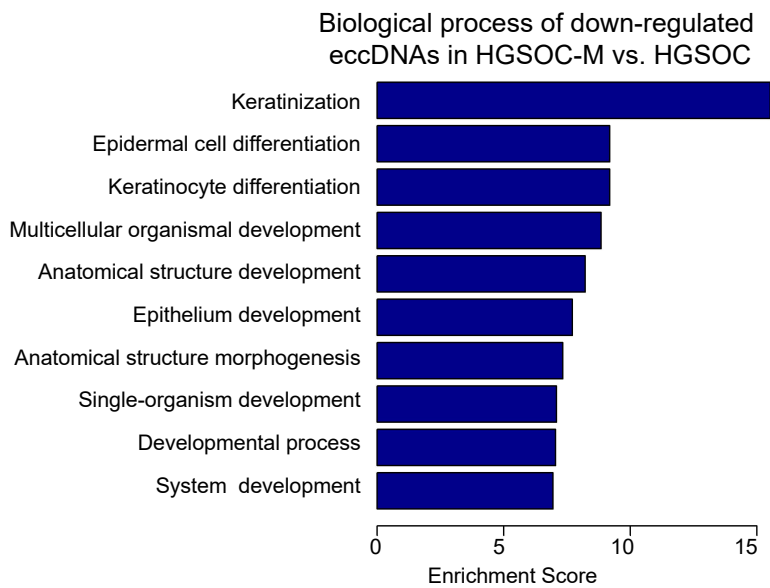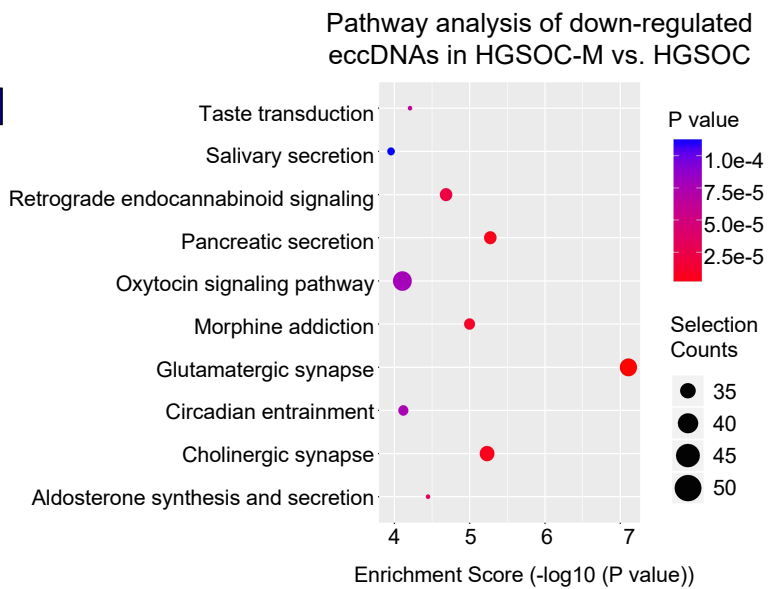

**Supplementary Fig. 2** **A** The biological process analysis of differentially expressed eccDNAs between HGSOC-M and HGSOC group. Upper, differentially up-regulated in HGSOC-M; Lower, differentially down-regulated in HGSOC-M; **B** The enrichment pathway analysis of differentially expressed eccDNAs between HGSOC-M and HGSOC group. Upper, differentially up-regulated in HGSOC-M; Lower, differentially down-regulated in HGSOC-M;

GO Biological Process Classification of the up-regulated interactions in HGSOC-M vs. HGSOC

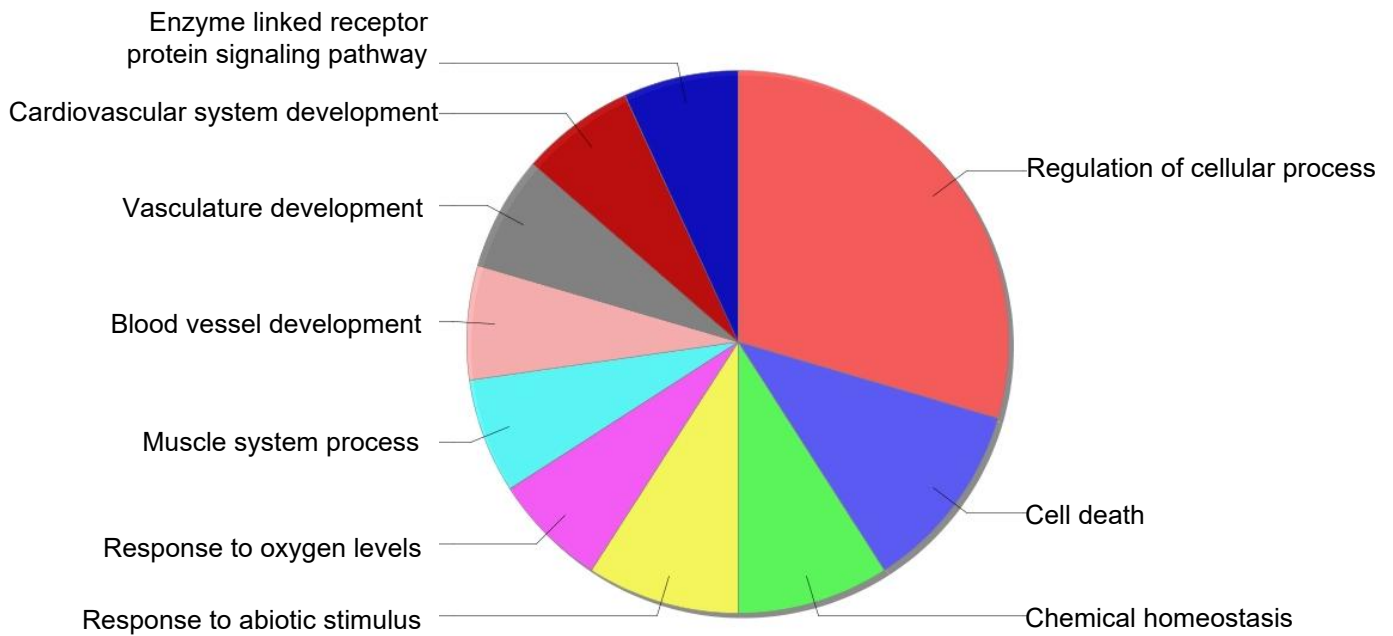

GO Biological Process Classification of the down-regulated interactions in HGSOC-M vs. HGSOC

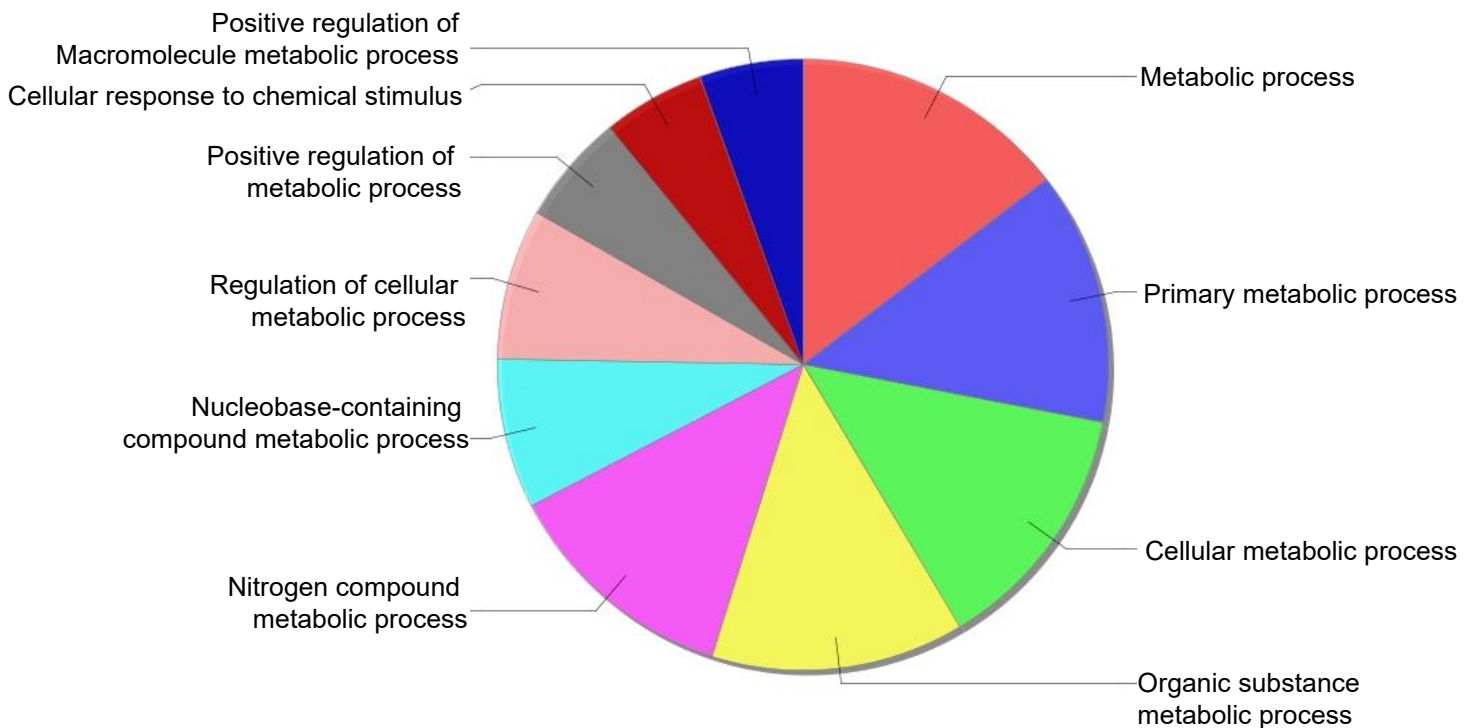

**Supplementary Fig. 3** The classification of GO biological process of the overlap targets of Circle-Seq and RNA-Seq. Upper, differentially up-regulated in HGSOC-M; Lower, differentially down-regulated in HGSOC-M.

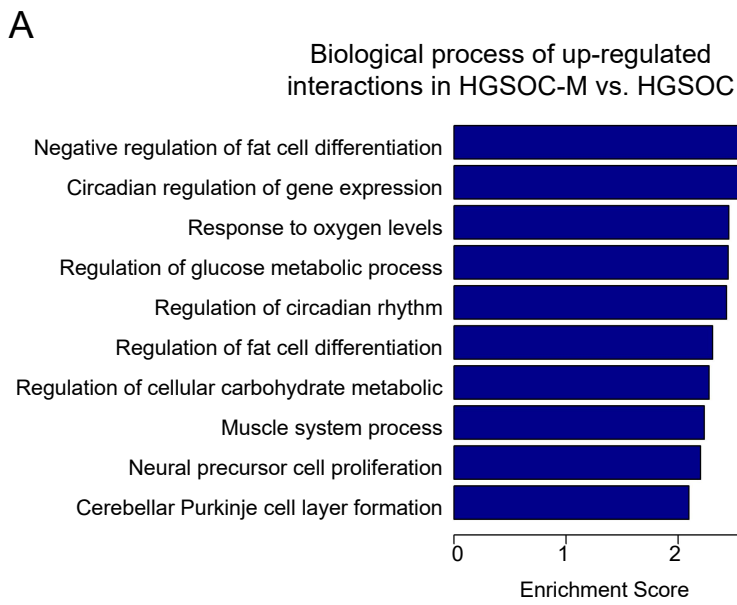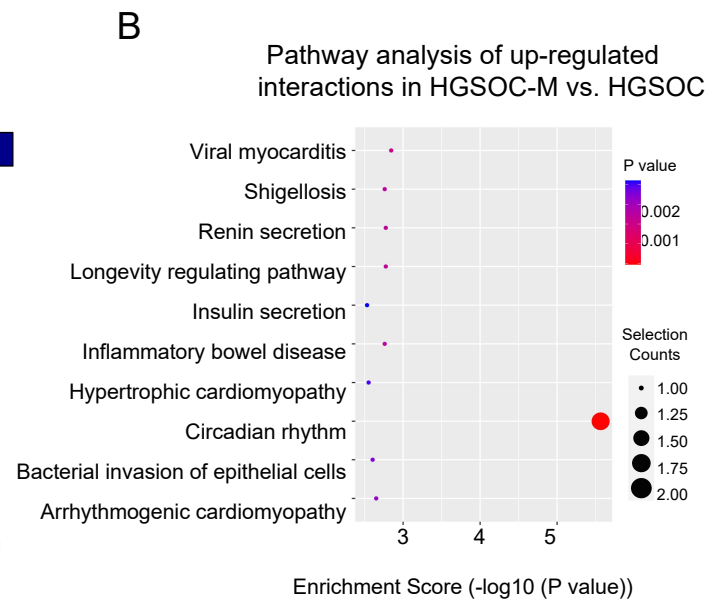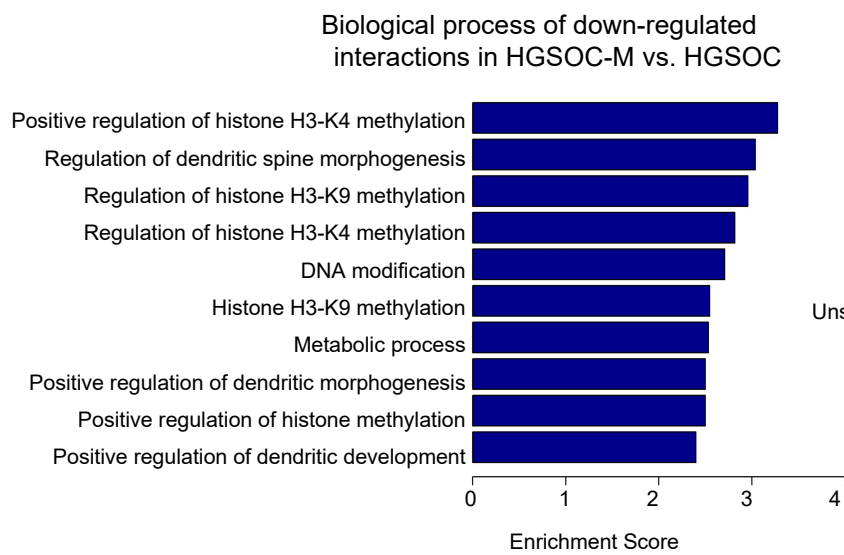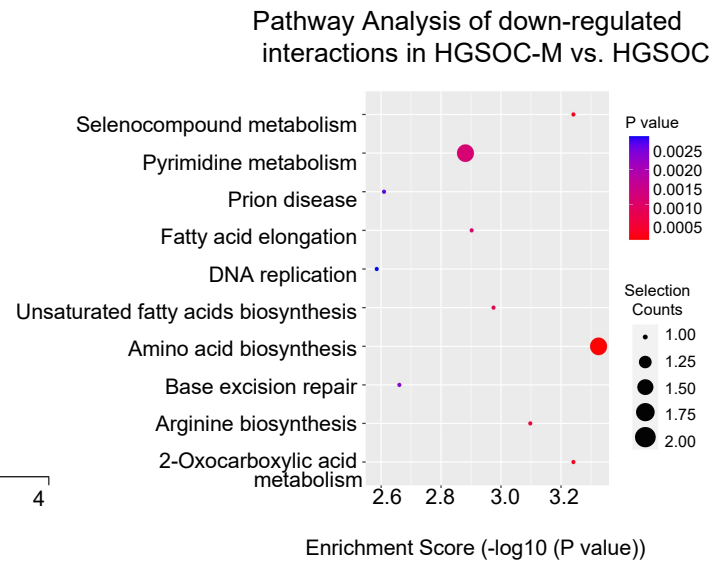

**Supplementary Fig. 4 (A)** The biological process analysis of overlap targets of Circle-Seq and RNA-Seq. Upper, differentially up-regulated in HGSOC-M; Lower, differentially down-regulated in HGSOC-M; **(B)** The enrichment pathway analysis of the overlap targets of Circle-Seq and RNA-Seq. Upper, differentially up-regulated in HGSOC-M; Lower, differentially down-regulated in HGSOC-M;

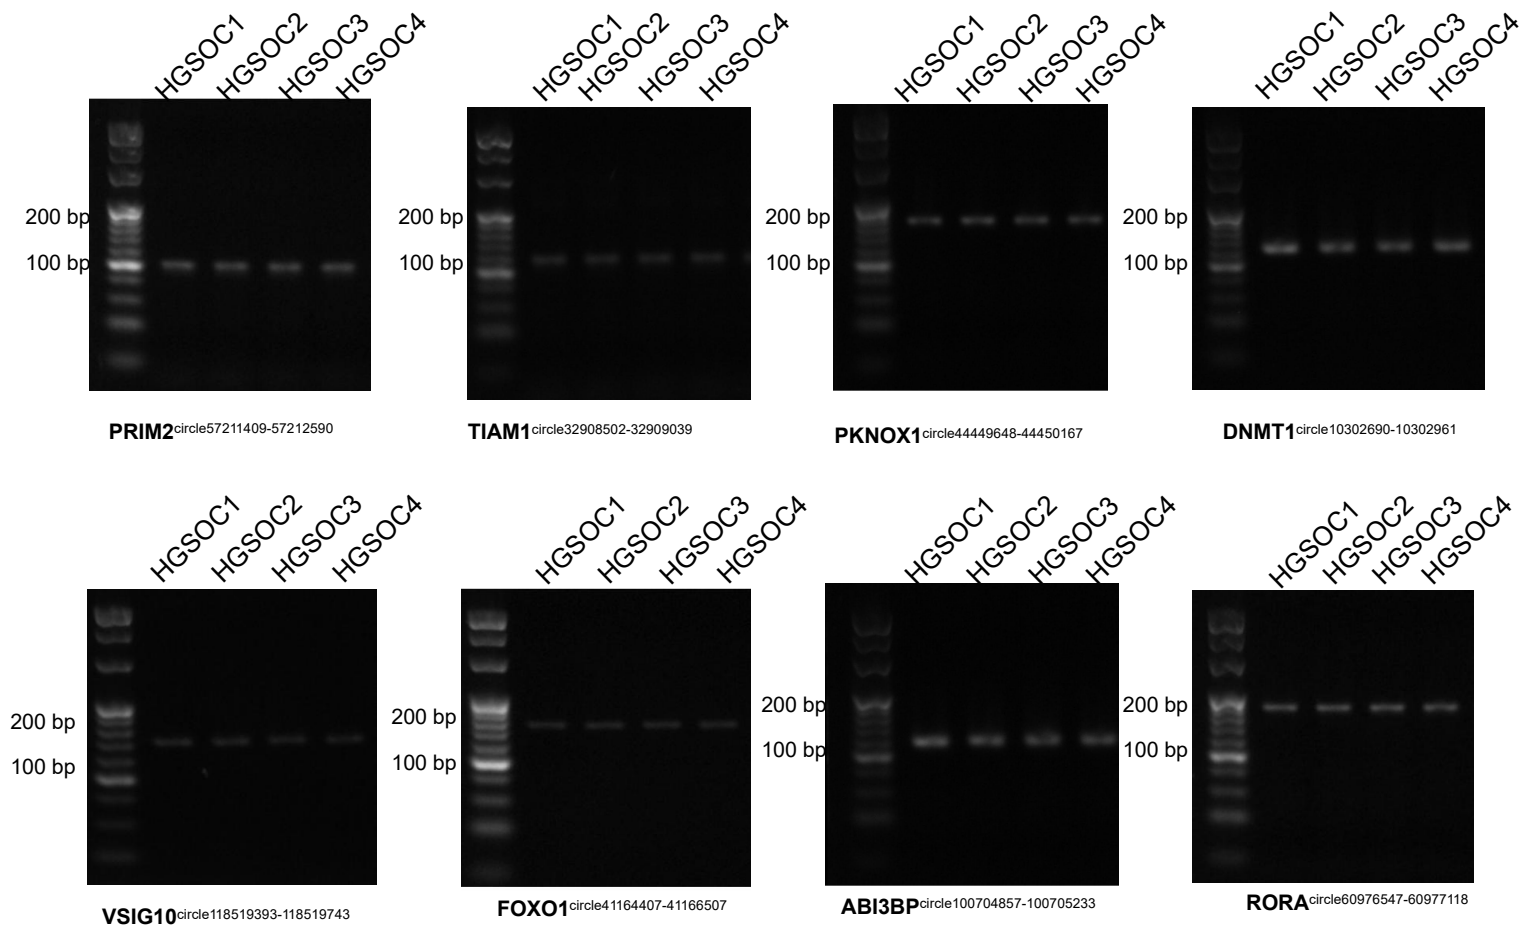

**Supplementary Fig. 5** Gel electrophoresis analysis for a validated subset (n = 8) of eccDNAs by outward PCR using HGSOC1-4 tissues. EccDNAs were named according to gene content.

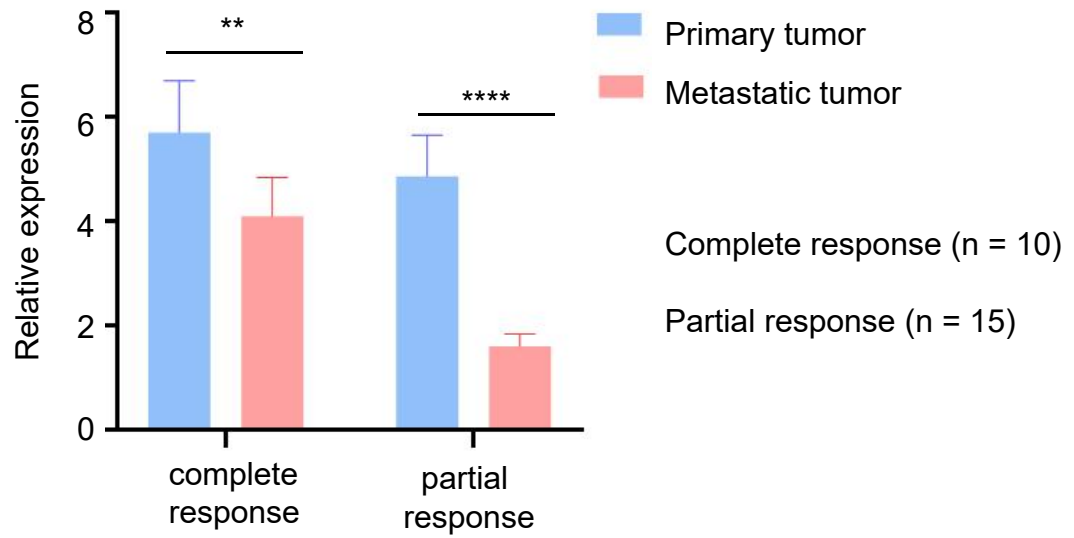

**Supplementary Fig. 6** The DNMT1<sup>circle10302690-10302961</sup> expression of metastatic and primary tumors in 25 HGSOC patients who received NACT. The data were shown as mean  $\pm$  SD. \*\* P < 0.01, \*\*\*\* P < 0.0001.
