# Supplementary material for: Global characterization of extrachromosomal circular DNAs in advanced high grade serous ovarian cancer
Source: PubMed Central journal article supplement (PMC9007969; doi:10.1038/s41419-022-04807-8), 2022-04-13
Supplement: 41419_2022_4807_MOESM3_ESM.pdf [file 41419_2022_4807_MOESM3_ESM.pdf]

### Supplementary Table 1.

#### Information for specimens

The paired primary and metastatic tissues of HGSOC were collected from patients who underwent surgical cytoreduction. All patients did not receive any radiotherapy or chemotherapy before operation.

#### For eccDNA-seq/mRNA-seq

| <b>Pathological diagnosis</b> | <b>Sample No.</b> | <b>age</b> | <b>stage</b> | <b>Primary site</b> | <b>Metastatic site</b>      |
|-------------------------------|-------------------|------------|--------------|---------------------|-----------------------------|
| HGSOC                         | 1                 | 48         | IIIC         | Left ovary          | Metastatic tumor at Omentum |
| HGSOC                         | 2                 | 51         | IIIC         | Right ovary         | Metastatic tumor at Omentum |
| HGSOC                         | 3                 | 50         | IVB          | Left ovary          | Metastatic tumor at spleen  |
| HGSOC                         | 4                 | 82         | IIIA1i       | Left ovary          | Metastatic tumor at Rectum  |

#### For validation

| <b>Pathological diagnosis</b> | <b>Sample No.</b> | <b>age</b> | <b>stage</b> | <b>Primary site</b> | <b>Metastatic site</b>                    |
|-------------------------------|-------------------|------------|--------------|---------------------|-------------------------------------------|
| HGSOC                         | 1                 | 50         | IIIC         | Right ovary         | Metastatic tumor at Omentum               |
| HGSOC                         | 2                 | 55         | IIIA         | Left ovary          | Lymph nodes of left pelvic                |
| HGSOC                         | 3                 | 50         | IIIB         | Right ovary         | Metastatic tumor at Peritoneum            |
| HGSOC                         | 4                 | 71         | IIIC         | Left ovary          | Metastatic tumor at omentum               |
| HGSOC                         | 5                 | 68         | IIIC         | Right ovary         | Metastatic tumor at omentum               |
| HGSOC                         | 6                 | 59         | IVB          | Left ovary          | Metastatic tumor at left paracolic sulcus |

|       |    |    |               |             |                                                    |
|-------|----|----|---------------|-------------|----------------------------------------------------|
| HGSOC | 7  | 57 | IIIC          | Left ovary  | Metastatic tumor at rectum surface                 |
| HGSOC | 8  | 49 | IIB           | Left ovary  | Metastatic tumor at sigmoid surface                |
| HGSOC | 9  | 71 | IIIA1<br>(ii) | Left ovary  | Metastatic tumor at sigmoid surface                |
| HGSOC | 10 | 51 | IIIB          | Right ovary | Metastatic tumor at rectum surface                 |
| HGSOC | 11 | 52 | IIIC          | Right ovary | Metastatic tumor at mesocolon<br>transversum       |
| HGSOC | 12 | 42 | IVB           | Left ovary  | Metastatic tumor at Omentum                        |
| HGSOC | 13 | 51 | IIIC          | Left ovary  | Metastatic tumor at Omentum                        |
| HGSOC | 14 | 50 | IIIC          | Left ovary  | Metastatic tumor at mesenteriolum                  |
| HGSOC | 15 | 58 | IIIC          | Left ovary  | Metastatic tumor at paracolon<br>sulcus peritoneum |
| HGSOC | 16 | 50 | IIIB          | Right ovary | Metastatic tumor at omentum                        |
| HGSOC | 17 | 58 | IIIC          | Left ovary  | Metastatic tumor at colon ascendens                |
| HGSOC | 18 | 62 | IIIC          | Right ovary | Metastatic tumor at colon descendens               |
| HGSOC | 19 | 48 | IIIC          | Left ovary  | Metastatic tumor at omentum                        |
| HGSOC | 20 | 50 | IIIC          | Right ovary | Metastatic tumor at ileocecal junction             |
