# Supplementary material for: Global characterization of extrachromosomal circular DNAs in advanced high grade serous ovarian cancer
Source: PubMed Central journal article supplement (PMC9007969; doi:10.1038/s41419-022-04807-8), 2022-04-13
Supplement: 41419_2022_4807_MOESM6_ESM.pdf [file 41419_2022_4807_MOESM6_ESM.pdf]

**Supplementary Table 4.**

The eight eccDNA candidates selected from the overlap of Circle-Seq and transcriptome sequencing.

| <b>Chr</b> | <b>Start</b> | <b>End</b> | <b>Size<br/>(bp)</b> | <b>Gene<br/>present</b> | <b>mRNA<br/>HGSOC-M<br/>vs<br/>HGSOC</b> | <b>eccDNA<br/>HGSOC-M<br/>vs<br/>HGSOC</b> |
|------------|--------------|------------|----------------------|-------------------------|------------------------------------------|--------------------------------------------|
| Chr21      | 32908502     | 32909039   | 538                  | TIAM1                   | ↓                                        | ↓                                          |
| Chr6       | 57211409     | 57212590   | 1182                 | PRIM2                   | ↓                                        | ↓                                          |
| Chr21      | 44449648     | 44450167   | 520                  | PKNOX1                  | ↓                                        | ↓                                          |
| Chr19      | 10302690     | 10302961   | 271                  | DNMT1                   | ↓                                        | ↓                                          |
| Chr12      | 118519393    | 118519743  | 351                  | VSIG10                  | ↓                                        | ↓                                          |
| Chr3       | 100704857    | 100705233  | 377                  | ABI3BP                  | ↑                                        | ↑                                          |
| Chr15      | 60976547     | 60977118   | 572                  | RORA                    | ↑                                        | ↑                                          |
| Chr13      | 41164407     | 41166507   | 2101                 | FOXO1                   | ↑                                        | ↑                                          |
