# Supplementary material for: Global characterization of extrachromosomal circular DNAs in advanced high grade serous ovarian cancer
Source: PubMed Central journal article supplement (PMC9007969; doi:10.1038/s41419-022-04807-8), 2022-04-13
Supplement: 41419_2022_4807_MOESM7_ESM.pdf [file 41419_2022_4807_MOESM7_ESM.pdf]

## Supplementary Table 5

Information of 80 HGSOC patients with complete 5-year follow up used for OS and DFS analysis.

| Case No. | age (years) | FIGO stage | Grade | CA125 (U/mL) | No visible residual disease (R0) (for FIGO III-IV) | lymph node metastasis | DFS time (months) | OS time (months) |
|----------|-------------|------------|-------|--------------|----------------------------------------------------|-----------------------|-------------------|------------------|
| 1        | 58          | IIB        | G3    | 663.8        | /                                                  | (-)                   | 60                | 60               |
| 2        | 53          | IIB        | G3    | 35.3         | /                                                  | (-)                   | 60                | 60               |
| 3        | 52          | IIIC       | G3    | 725.8        | no                                                 | (-)                   | 20                | 26               |
| 4        | 61          | IIIC       | G3    | 1097         | no                                                 | (-)                   | 14                | 19               |
| 5        | 49          | IIIC       | G3    | 956.6        | yes                                                | (-)                   | 21                | 45               |
| 6        | 69          | IV         | G3    | 659          | yes                                                | (-)                   | 5                 | 7                |
| 7        | 58          | IIIC       | G3    | 2006         | yes                                                | (+)                   | 11                | 52               |
| 8        | 71          | IIIC       | G3    | 108.5        | yes                                                | (-)                   | 18                | 60               |
| 9        | 57          | IIB        | G3    | 702.9        | /                                                  | (-)                   | 60                | 60               |
| 10       | 54          | IIIC       | G3    | 1872         | no                                                 | (-)                   | 17                | 60               |
| 11       | 62          | IIB        | G3    | 318          | /                                                  | (-)                   | 14                | 60               |
| 12       | 61          | IIIC       | G3    | 4374         | yes                                                | (+)                   | 20                | 60               |
| 13       | 34          | IC1        | G3    | 28.1         | /                                                  | (-)                   | 60                | 60               |
| 14       | 55          | IIIC       | G3    | 364.8        | no                                                 | (-)                   | 33                | 60               |
| 15       | 66          | IIIC       | G3    | 363.6        | no                                                 | (+)                   | 14                | 29               |
| 16       | 50          | IIIC       | G3    | 466.8        | no                                                 | (+)                   | 20                | 38               |
| 17       | 57          | IIA        | G3    | 563.3        | /                                                  | (-)                   | 60                | 60               |
| 18       | 62          | IIIC       | G3    | 363.1        | /                                                  | (-)                   | 14                | 38               |
| 19       | 62          | IIIC       | G3    | 44.4         | /                                                  | (-)                   | 60                | 60               |
| 20       | 63          | IIIC       | G3    | 209.4        | no                                                 | (+)                   | 60                | 60               |
| 21       | 45          | IIIC       | G3    | 3666.7       | yes                                                | (+)                   | 60                | 60               |
| 22       | 65          | IIIC       | G3    | 409.4        | yes                                                | (-)                   | 60                | 60               |
| 23       | 77          | IIIC       | G3    | 103.9        | yes                                                | (-)                   | 12                | 60               |
| 24       | 43          | IIIC       | G3    | 3940         | no                                                 | (+)                   | 24                | 60               |
| 25       | 49          | IIIC       | G3    | 2456         | yes                                                | (+)                   | 13                | 60               |
| 26       | 49          | IIIA2      | G3    | 74.9         | yes                                                | (-)                   | 60                | 60               |
| 27       | 50          | IIIC       | G3    | 770.3        | no                                                 | (-)                   | 39                | 60               |
| 28       | 60          | IIA        | G3    | 13           | /                                                  | (-)                   | 60                | 60               |
| 29       | 49          | IIA        | G3    | 41.63        | /                                                  | (-)                   | 60                | 60               |
| 30       | 51          | IIIC       | G3    | 1213         | yes                                                | (+)                   | 59                | 60               |
| 31       | 39          | IV         | G3    | 884.9        | yes                                                | (-)                   | 60                | 60               |
| 32       | 55          | IIIC       | G3    | 717.4        | no                                                 | (-)                   | 60                | 60               |
| 33       | 55          | IIIC       | G3    | 1139         | yes                                                | (-)                   | 19                | 60               |
| 34       | 50          | IIIC       | G3    | 196.9        | yes                                                | (+)                   | 60                | 60               |
| 35       | 39          | IIIC       | G3    | 3159         | no                                                 | (+)                   | 29                | 60               |
| 36       | 56          | IIIc       | G3    | 9868         | yes                                                | (-)                   | 12                | 60               |

|    |    |       |    |       |     |     |    |    |
|----|----|-------|----|-------|-----|-----|----|----|
| 37 | 62 | IA    | G3 | 67.5  | /   | (-) | 60 | 60 |
| 38 | 64 | III C | G3 | 148.2 | yes | (-) | 60 | 60 |
| 39 | 54 | IC    | G3 | 18.9  | /   | (-) | 60 | 60 |
| 40 | 59 | IIIB  | G3 | 485.1 | yes | (-) | 60 | 60 |
| 41 | 57 | III C | G3 | 1374  | no  | (-) | 12 | 60 |
| 42 | 47 | III C | G3 | 202.6 | yes | (-) | 60 | 60 |
| 43 | 57 | IIIA  | G3 | 369.1 | yes | (-) | 60 | 60 |
| 44 | 49 | III C | G3 | 258.1 | no  | (+) | 17 | 60 |
| 45 | 47 | III C | G3 | 9744  | yes | (-) | 60 | 60 |
| 46 | 56 | III C | G3 | 264.2 | yes | (-) | 60 | 60 |
| 47 | 55 | II C  | G3 | 12.5  | /   | (-) | 60 | 60 |
| 48 | 46 | IIA   | G3 | 182.4 | /   | (-) | 60 | 60 |
| 49 | 59 | III C | G3 | 2215  | no  | (-) | 60 | 60 |
| 50 | 68 | IIA   | G3 | 36.9  | /   | (-) | 60 | 60 |
| 51 | 58 | IC    | G3 | 228.3 | /   | (-) | 60 | 60 |
| 52 | 54 | II B  | G3 | 1054  | /   | (-) | 22 | 60 |
| 53 | 41 | III C | G3 | 600   | yes | (-) | 60 | 60 |
| 54 | 41 | II C  | G3 | 805.8 | /   | (-) | 26 | 60 |
| 55 | 52 | III C | G3 | 1000  | no  | (-) | 13 | 24 |
| 56 | 45 | IIIB  | G3 | 335.8 | no  | (+) | 13 | 31 |
| 57 | 62 | III C | G3 | 342.6 | yes | (-) | 19 | 30 |
| 58 | 71 | II B  | G3 | 20.7  | /   | (-) | 11 | 24 |
| 59 | 52 | III C | G3 | 1996  | no  | (+) | 10 | 23 |
| 60 | 78 | III C | G3 | 1665  | no  | (-) | 14 | 20 |
| 61 | 49 | IIIA1 | G3 | 211.5 | yes | (+) | 36 | 41 |
| 62 | 51 | III C | G3 | 1330  | no  | (+) | 4  | 6  |
| 63 | 69 | III C | G3 | 153.3 | yes | (-) | 7  | 17 |
| 64 | 43 | III C | G3 | 217.2 | no  | (-) | 8  | 16 |
| 65 | 62 | III C | G3 | 216.8 | yes | (+) | 8  | 18 |
| 66 | 63 | III C | G3 | 1745  | yes | (+) | 16 | 19 |
| 67 | 49 | III C | G3 | 140.5 | no  | (+) | 6  | 10 |
| 68 | 48 | III C | G3 | 1822  | no  | (+) | 10 | 19 |
| 69 | 53 | IVB   | G3 | 1245  | no  | (+) | 12 | 35 |
| 70 | 51 | III C | G3 | 204.3 | yes | (-) | 22 | 32 |
| 71 | 65 | III C | G3 | 622.3 | no  | (-) | 9  | 19 |
| 72 | 63 | III C | G3 | 727.6 | no  | (-) | 12 | 19 |
| 73 | 45 | IIIB  | G3 | 89.5  | yes | (-) | 3  | 5  |
| 74 | 56 | III C | G3 | 1894  | no  | (+) | 11 | 23 |
| 75 | 64 | III C | G3 | 546.6 | no  | (-) | 9  | 17 |
| 76 | 67 | III C | G3 | 4643  | yes | (-) | 12 | 34 |
| 77 | 63 | III C | G3 | 2830  | yes | (-) | 18 | 60 |
| 78 | 61 | III C | G3 | 62.2  | yes | (-) | 60 | 60 |
| 79 | 43 | III C | G3 | 832.6 | yes | (-) | 8  | 60 |
| 80 | 50 | III C | G3 | 812.3 | yes | (+) | 48 | 60 |

(-) represents negative lymph node metastasis;  
(+) represents positive lymph node metastasis.
