# Supplementary material for: Global characterization of extrachromosomal circular DNAs in advanced high grade serous ovarian cancer
Source: PubMed Central journal article supplement (PMC9007969; doi:10.1038/s41419-022-04807-8), 2022-04-13
Supplement: 41419_2022_4807_MOESM8_ESM.pdf [file 41419_2022_4807_MOESM8_ESM.pdf]

### Supplementary Table 6

Information of 25 advanced HGSOC patients received neoadjuvant chemotherapy (NACT).

| Case No. | age (years) | Pathological diagnosis | FIGO stage | NACT |
|----------|-------------|------------------------|------------|------|
| 1        | 64          | HGSOC                  | IIIC       | 1    |
| 2        | 58          | HGSOC                  | IIIC       | 1    |
| 3        | 51          | HGSOC                  | IV         | 1    |
| 4        | 63          | HGSOC                  | IIIC       | 1    |
| 5        | 49          | HGSOC                  | IV         | 1    |
| 6        | 66          | HGSOC                  | IIIB       | 1    |
| 7        | 48          | HGSOC                  | IV         | 1    |
| 8        | 41          | HGSOC                  | IVA        | 1    |
| 9        | 72          | HGSOC                  | IV         | 1    |
| 10       | 30          | HGSOC                  | IV         | 1    |
| 11       | 61          | HGSOC                  | IIIC       | 1    |
| 12       | 61          | HGSOC                  | IVB        | 1    |
| 13       | 59          | HGSOC                  | IIIC       | 1    |
| 14       | 71          | HGSOC                  | IIIC       | 1    |
| 15       | 68          | HGSOC                  | IV         | 1    |
| 16       | 71          | HGSOC                  | IIIC       | 1    |
| 17       | 76          | HGSOC                  | IVB        | 1    |
| 18       | 31          | HGSOC                  | IVA        | 1    |
| 19       | 55          | HGSOC                  | IVB        | 1    |
| 20       | 72          | HGSOC                  | IVB        | 1    |
| 21       | 74          | HGSOC                  | IV         | 1    |
| 22       | 47          | HGSOC                  | IV         | 1    |
| 23       | 63          | HGSOC                  | IVB        | 1    |
| 24       | 73          | HGSOC                  | IV         | 1    |
| 25       | 63          | HGSOC                  | IV         | 1    |

1 represents that the patient has received NACT treatment.
