# Supplementary material for: Global characterization of extrachromosomal circular DNAs in advanced high grade serous ovarian cancer
Source: PubMed Central journal article supplement (PMC9007969; doi:10.1038/s41419-022-04807-8), 2022-04-13
Supplement: 41419_2022_4807_MOESM9_ESM.pdf [file 41419_2022_4807_MOESM9_ESM.pdf]

## Supplementary Table 7

Primers in this study.

| primers                    |         |                         |
|----------------------------|---------|-------------------------|
| Gene                       | Primer  | Sequence(5' to 3')      |
| pGEX-5X-2                  | Forward | GGGCTGGCAAGCCACGTTTGGTG |
|                            | Reverse | CCGGGAGCTGCATGTGTCAGAGG |
| GAPDH                      | Forward | TCACCACCATGGAGAAGGC     |
|                            | Reverse | GCTAAGCAGTTGGTGGTGCA    |
| TIAM1<br>(outward<br>PCR)  | Forward | GGTGAGCAAGGAGTGAGGAG    |
|                            | Reverse | TGCCTTATGCCTCAGTTTCC    |
| PRIM2<br>(outward<br>PCR)  | Forward | TCCTCACAACAGCTCCATGA    |
|                            | Reverse | GGGAACTTGGAGGAAAGAGG    |
| PKNOX1<br>(outward<br>PCR) | Forward | GTCTGTGGACAGCACAGAGG    |
|                            | Reverse | CGGATAACGAGGTCAGGAGA    |
| DNMT1<br>(outward<br>PCR)  | Forward | GGTTCAAGGCTGCAGTAAGC    |
|                            | Reverse | AGATGGGCAGATCACCTGAG    |
| VSIG10<br>(outward<br>PCR) | Forward | TGCCTGTAATCCCAGCTACC    |
|                            | Reverse | TGTGGCTCCCTCAATACACA    |
| FOXO1<br>(outward<br>PCR)  | Forward | AATCTCCAGCACTCCGCTTA    |
|                            | Reverse | TGCATCATTGGGCTTAGATG    |
| ABI3BP<br>(outward<br>PCR) | Forward | AATCTCCAGCACTCCGCTTA    |
|                            | Reverse | TGCATCATTGGGCTTAGATG    |
| RORA<br>(outward<br>PCR)   | Forward | AGGCTTGACATTGACTCCT     |
|                            | Reverse | ACGTCATGATCCACCCATCT    |
| TIAM1                      | Forward | GATCCACAGGAACTCCGAAGT   |
|                            | Reverse | GCTCCCGAAGTCTTCTAGGGT   |
| PKNOX1                     | Forward | ATAGACAGCTATCAAGATGGGCA |
|                            | Reverse | GCATCGGGTTCAGAGCAGTTT   |
| DNMT1                      | Forward | AGGCGGCTCAAAGATTTGGAA   |
|                            | Reverse | GCAGAAATTCGTGCAAGAGATTC |
| ABI3BP                     | Forward | CAAATGCAACATGCTCTCCAGT  |
|                            | Reverse | TTGGCCTTTTACCTTTTGGCA   |
| RORA                       | Forward | ACTCCTGTCCTCGTCAGAAGA   |
|                            | Reverse | CATCCCTACGGCAAGGCATTT   |
